# Supplementary material
Source: PubMed Central journal article supplement (PMC8194108)
Supplement: NIHMS1705843-supplement-1705843_Supp_Tab_1to3.pdf [file NIHMS1705843-supplement-1705843_Supp_Tab_1to3.pdf]

**Supplemental Table 1. Workflows used to isolate SARS-CoV-2 specific human mAbs from single B cells**

| Single B cell technique | Ag used for cell sorting                 | Feeder layer stimulation | Functional screen on instrument | Sequencing technique<br>(cDNA used)          | Screening, sequencing, cloning information                                                                                                                                                                                                                                                                                  |
|-------------------------|------------------------------------------|--------------------------|---------------------------------|----------------------------------------------|-----------------------------------------------------------------------------------------------------------------------------------------------------------------------------------------------------------------------------------------------------------------------------------------------------------------------------|
| Beacon                  | S2P <sub>ecto</sub> +/- S <sub>RBD</sub> | +                        | S2P <sub>ecto</sub> binding     | PacBio SMRT or Sanger<br><br>(PCR amplicon)  | <p>Cells loaded to instrument: ~14,000</p> <p>Cells in pens for screen: ~4,000</p> <p>% Ag-reactive: ~55%</p> <p>Cells exported: 288</p> <p>V<sub>H</sub>:V<sub>L</sub> paired sequences recovered: 156</p> <p>mAbs cloned and expressed: 96</p> <p>Ag-reactive mAbs: 78</p> <p>Directly cloned cDNA in pMCis_G1 vector</p> |
|                         |                                          |                          | RBD-mFc binding                 |                                              |                                                                                                                                                                                                                                                                                                                             |
|                         |                                          |                          | RBD-mFc binding + ACE2 blocking |                                              |                                                                                                                                                                                                                                                                                                                             |
| Chromium                | S2P <sub>ecto</sub>                      | +                        | na                              | Illumina Novaseq<br><br>(Chromium libraries) | <p>Cells sequenced: ~4,500 unstimulated<br/>~40,000 stimulated</p> <p>Number of mAbs synthesized: 761</p> <p>Ag-reactive mAbs: 311</p> <p>% Ag-reactive synthesized mAbs: ~41%</p> <p>Synthesized cDNA in pTwist-mCis_G1 vector</p>                                                                                         |
|                         |                                          | -                        |                                 |                                              |                                                                                                                                                                                                                                                                                                                             |
|                         | S <sub>RBD</sub>                         | +                        |                                 |                                              |                                                                                                                                                                                                                                                                                                                             |
|                         |                                          | -                        |                                 |                                              |                                                                                                                                                                                                                                                                                                                             |

| <b>Supplemental Table 2. Summary of electron microscopy data collection and statistics SARS-CoV-2 S2P<sub>ecto</sub> protein</b> |                               |             |
|----------------------------------------------------------------------------------------------------------------------------------|-------------------------------|-------------|
| Microscope setting                                                                                                               | Microscope                    | TF-20       |
|                                                                                                                                  | Voltage (kV)                  | 200         |
|                                                                                                                                  | Detector                      | US-4000 CCD |
|                                                                                                                                  | Magnification                 | 50,000×     |
|                                                                                                                                  | Pixel size                    | 2.18        |
|                                                                                                                                  | Exposure (e-/Å <sup>2</sup> ) | 25          |
|                                                                                                                                  | Defocus range (μm)            | 1.5 to 1.8  |
| Data                                                                                                                             | Micrographs, #                | 122         |
|                                                                                                                                  | Particles, #                  | 3,836       |
|                                                                                                                                  | Particles, # after 2D         | 2,718       |
|                                                                                                                                  | Final particles, #            | 2,188       |
|                                                                                                                                  | Symmetry                      | C1          |

**Supplemental Table 3. Human subjects studied in this paper**

| <b>Subject type</b> | <b>Subject</b> | <b>Age (years)</b> | <b>Sex</b> | <b>City where infected</b> | <b>Date of symptom onset</b> | <b>Date of blood sample collection (days after symptom onset)</b> |
|---------------------|----------------|--------------------|------------|----------------------------|------------------------------|-------------------------------------------------------------------|
| COVID-19            | 1              | 35                 | M          | Wuhan                      | Jan. 15, 2020                | February 19, 2020<br>(35 days)                                    |
|                     | 2              | 52                 | F          | Beijing                    | Feb. 1, 2020                 | March 8, 2020<br>(36 days)                                        |
|                     | 3              | 56                 | M          | Wuhan                      | Jan. 20, 2020                | March 10, 2020<br>(50 days)                                       |
|                     | 4              | 56                 | F          | Wuhan                      | Jan. 20, 2020                | March 10, 2020<br>(50 days)                                       |
| Healthy donors      | 5              | 58                 | M          | na                         | na                           | March 12, 2020<br>(na)                                            |
|                     | 6              | Unknown            | Unknown    | na                         | na                           | Unknown, commercially sourced healthy donor sample                |

na: indicates not applicable
